# Supplementary material for: Nolz1 expression is required in dopaminergic axon guidance and striatal innervation
Source: PubMed Central journal article supplement (PMC7305235; doi:10.1038/s41467-020-16947-6), 2020-06-19
Supplement: 41467_2020_16947_MOESM1_ESM.pdf [file 41467_2020_16947_MOESM1_ESM.pdf]

## **Supplementary information**

Soleilhavoup et al., **Nolz1 expression is required in dopaminergic axon guidance and striatal innervation**

Supplementary figures 1-8

Supplementary tables 1-3

Supplementary Figure 1

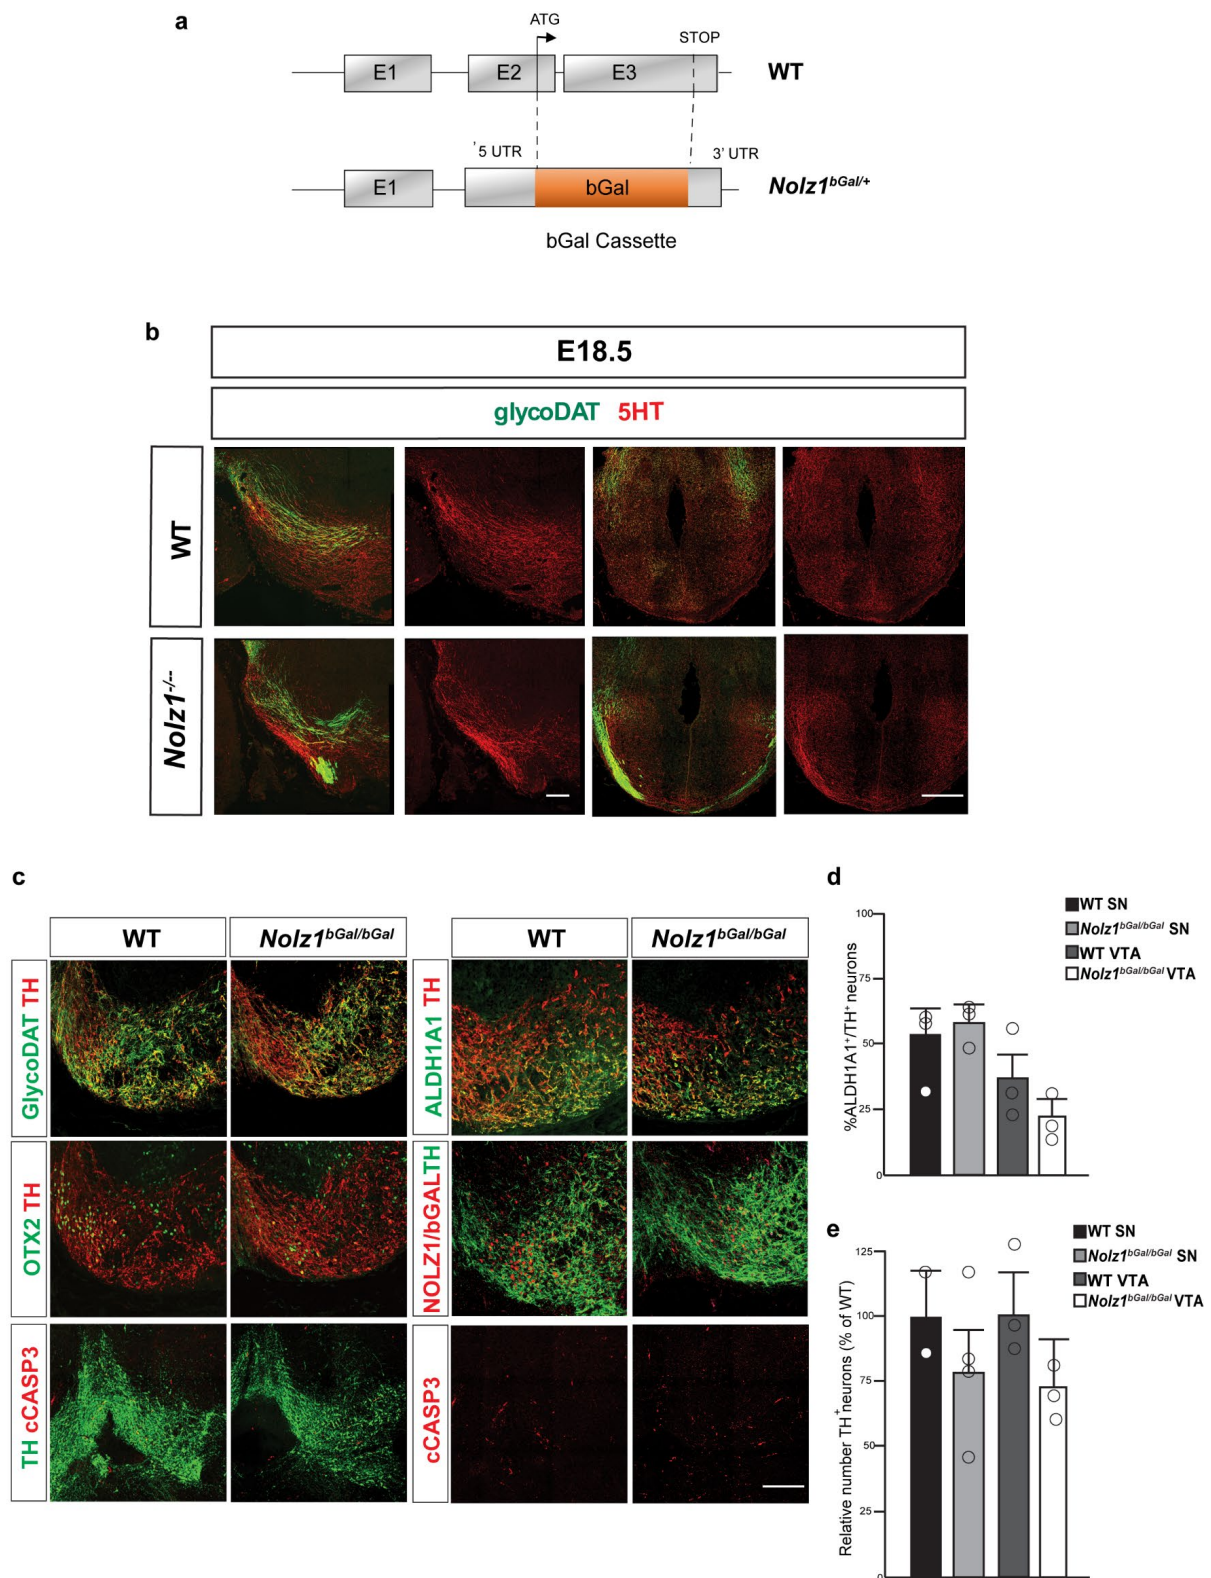

Supplementary Figure 1 . Analysis of DA subpopulation selective markers and serotonergic projections in WT and *Nolz1*<sup>-/-</sup> mutant embryos

(a) Schematic representation of the *Nolz1*<sup>bGal/bGal</sup> (also referred to as *Nolz1*<sup>-/-</sup>) allele. Coding regions of exon 2 and exon 3 were replaced by *bGal*. (b) Immunofluorescence analysis of

GlycoDAT and 5HT expression on sagittal and coronal section of E18.5 Wt and *Nolz1*<sup>-/-</sup> mutant hypothalamus. Misguidance of serotonergic axons in direction of the midline in the *Nolz1*<sup>-/-</sup> mutant hypothalamus. **(c)** Immunostaining of DA markers on coronal sections of E18.5 mouse midbrain. **(d)** Percentage of ALDH1A1 positive TH expressing neurons in the SN and VTA of E18.5 Wt and *Nolz1*<sup>-/-</sup> mutant midbrain (n=3 biologically independent samples). **(e)** Graph shows the relative number of TH<sup>+</sup> neurons in the SN and VTA of E18.5 Wt and *Nolz1*<sup>-/-</sup> mutant midbrain. (n=3 biologically independent samples). Wt values are normalized to 100%. Mean values +/- standard deviation. Data are representative of 3 independent experiments (b, c). Scale bar: 200 μm (b), 500 μm (c). Source data are provided as a source data file.

Supplementary Figure 2

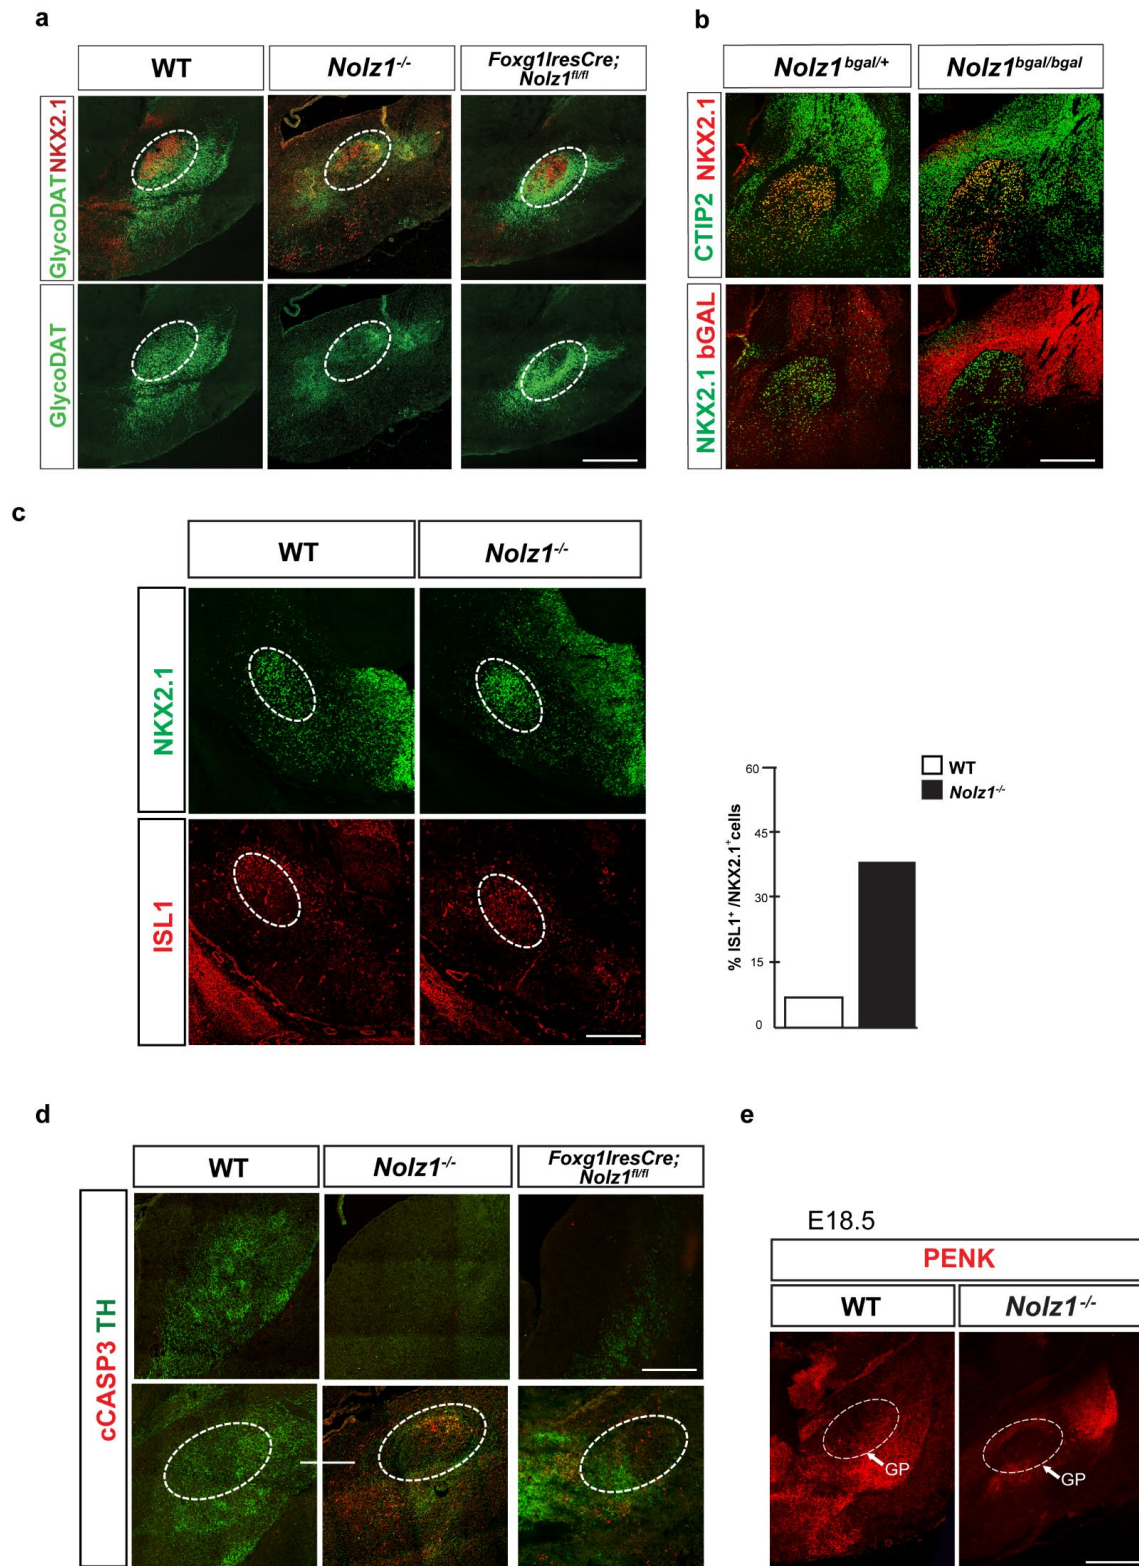

Supplementary Figure 2. Analysis of the globus pallidus development *Nolz1*<sup>-/-</sup> mutant embryos

(a) Immunohistochemical analysis showing expression of NKX2.1 and GlycoDAT on coronal sections of the globus pallidus from E18.5 Wt, *Nolz1*<sup>-/-</sup> and *Foxg1*<sup>IresCre</sup>;*Nolz1*<sup>fl/fl</sup> mutant

embryos. Dashed circle indicates location of the globus pallidus. **(b)** Immunostaining of NKX2.1, CTIP2, and bGAL on coronal sections of the globus pallidus of E18.5 *Nolz1<sup>bGal/+</sup>* and *Nolz1<sup>bGal/bgal</sup>* mutant embryos. **(c)** Immunofluorescence analysis of NKX2.1 and ISL1 on coronal section of the globus pallidus of E13.5 WT and *Nolz1<sup>-/-</sup>* mutant embryos. Dashed circle indicates location of the globus pallidus. The percentage of ISL1<sup>+</sup> against total NKX2.1<sup>+</sup> cells in E18.5 Wt and *Nolz1<sup>-/-</sup>* mutant embryos. **(d)** Immunohistochemical analysis showing expression of cCASP3 and TH on coronal sections of the striatum of E18.5 Wt, *Nolz1<sup>-/-</sup>* and *Foxg1iresCre;Nolz1<sup>fl/fl</sup>* mutant embryos. **(e)** Immunohistochemical analysis of PENK expression in E18.5 Wt and *Nolz1<sup>-/-</sup>* mutant striatum. Dashed circle indicates location of the globus pallidus. Data are representative of 3 (a-e) independent experiments. Scale bar: 200  $\mu\text{m}$  (a-e).



Supplementary Figure 3

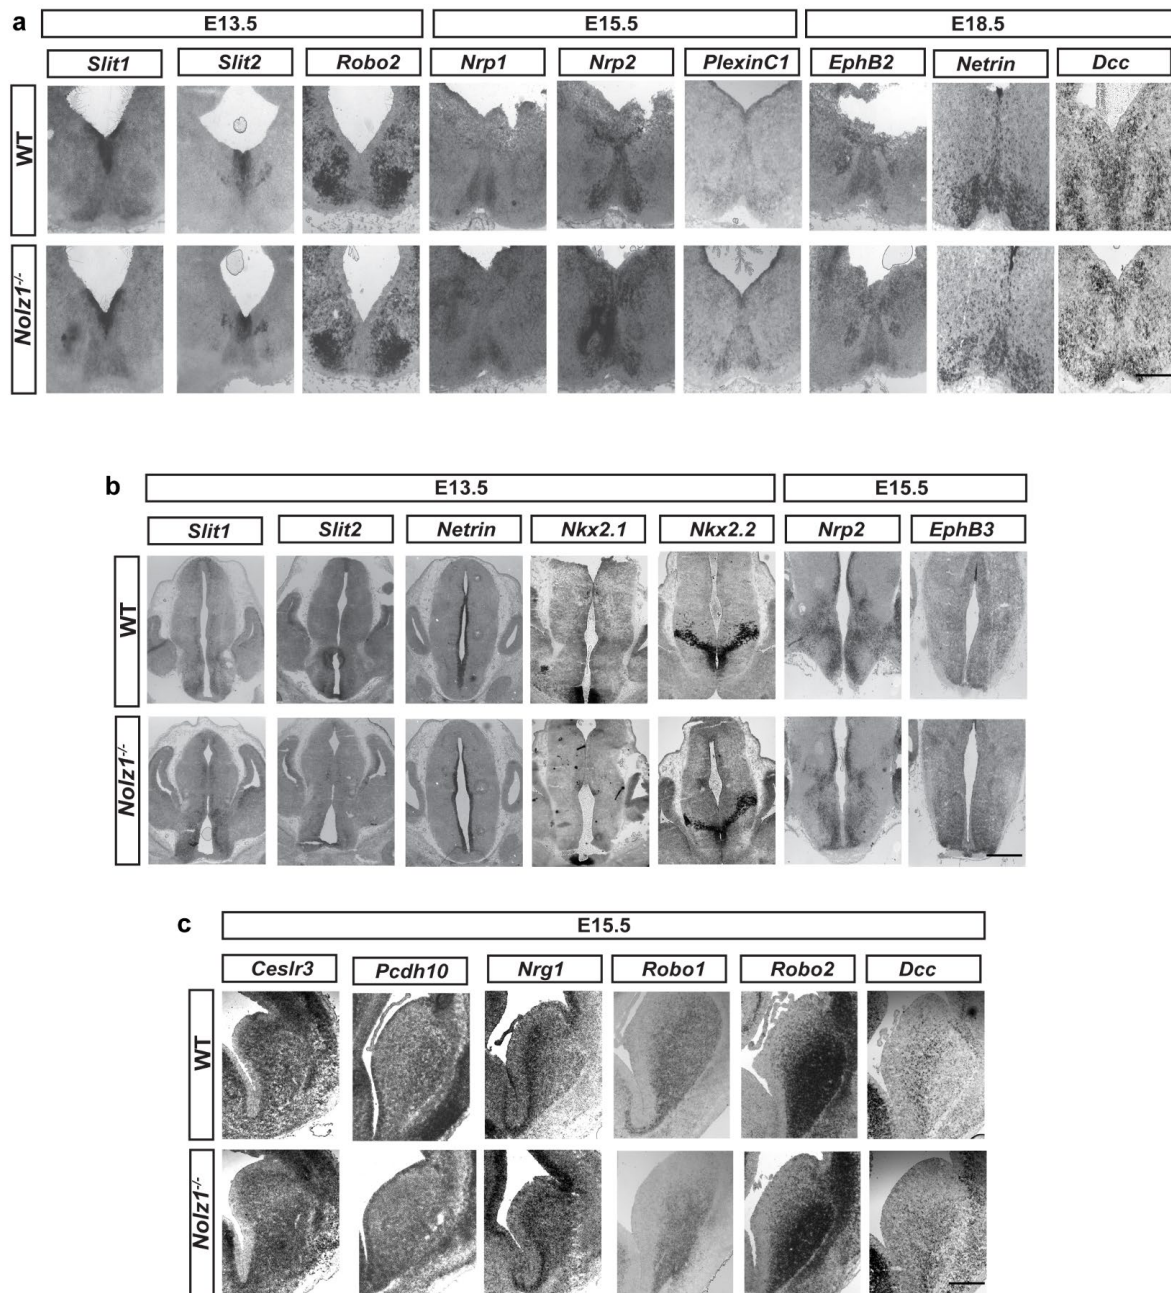

**Supplementary Figure 3. Unaltered expression of genes involved in axon guidance in *Nolz1*<sup>-/-</sup> mutant embryos**

**(a)** Analysis by in situ hybridization of several genes involved in axon guidance in Wt and *Nolz1*<sup>-/-</sup> mutant midbrain at E13.5, E15.5 and E18.5. Coronal sections. **(b)** Expression analysis of several genes involved in axon guidance in the diencephalon at E13.5 and E15.5 in Wt and *Nolz1*<sup>-/-</sup> mutant striatum. **(c)** In situ hybridisation for markers involved in striatal axon guidance at E15.5 in Wt and *Nolz1*<sup>-/-</sup> embryos. Data are representative of 3 (a-c) independent experiments Scale bar: 200  $\mu$ m (a-c).

Supplementary Figure 4

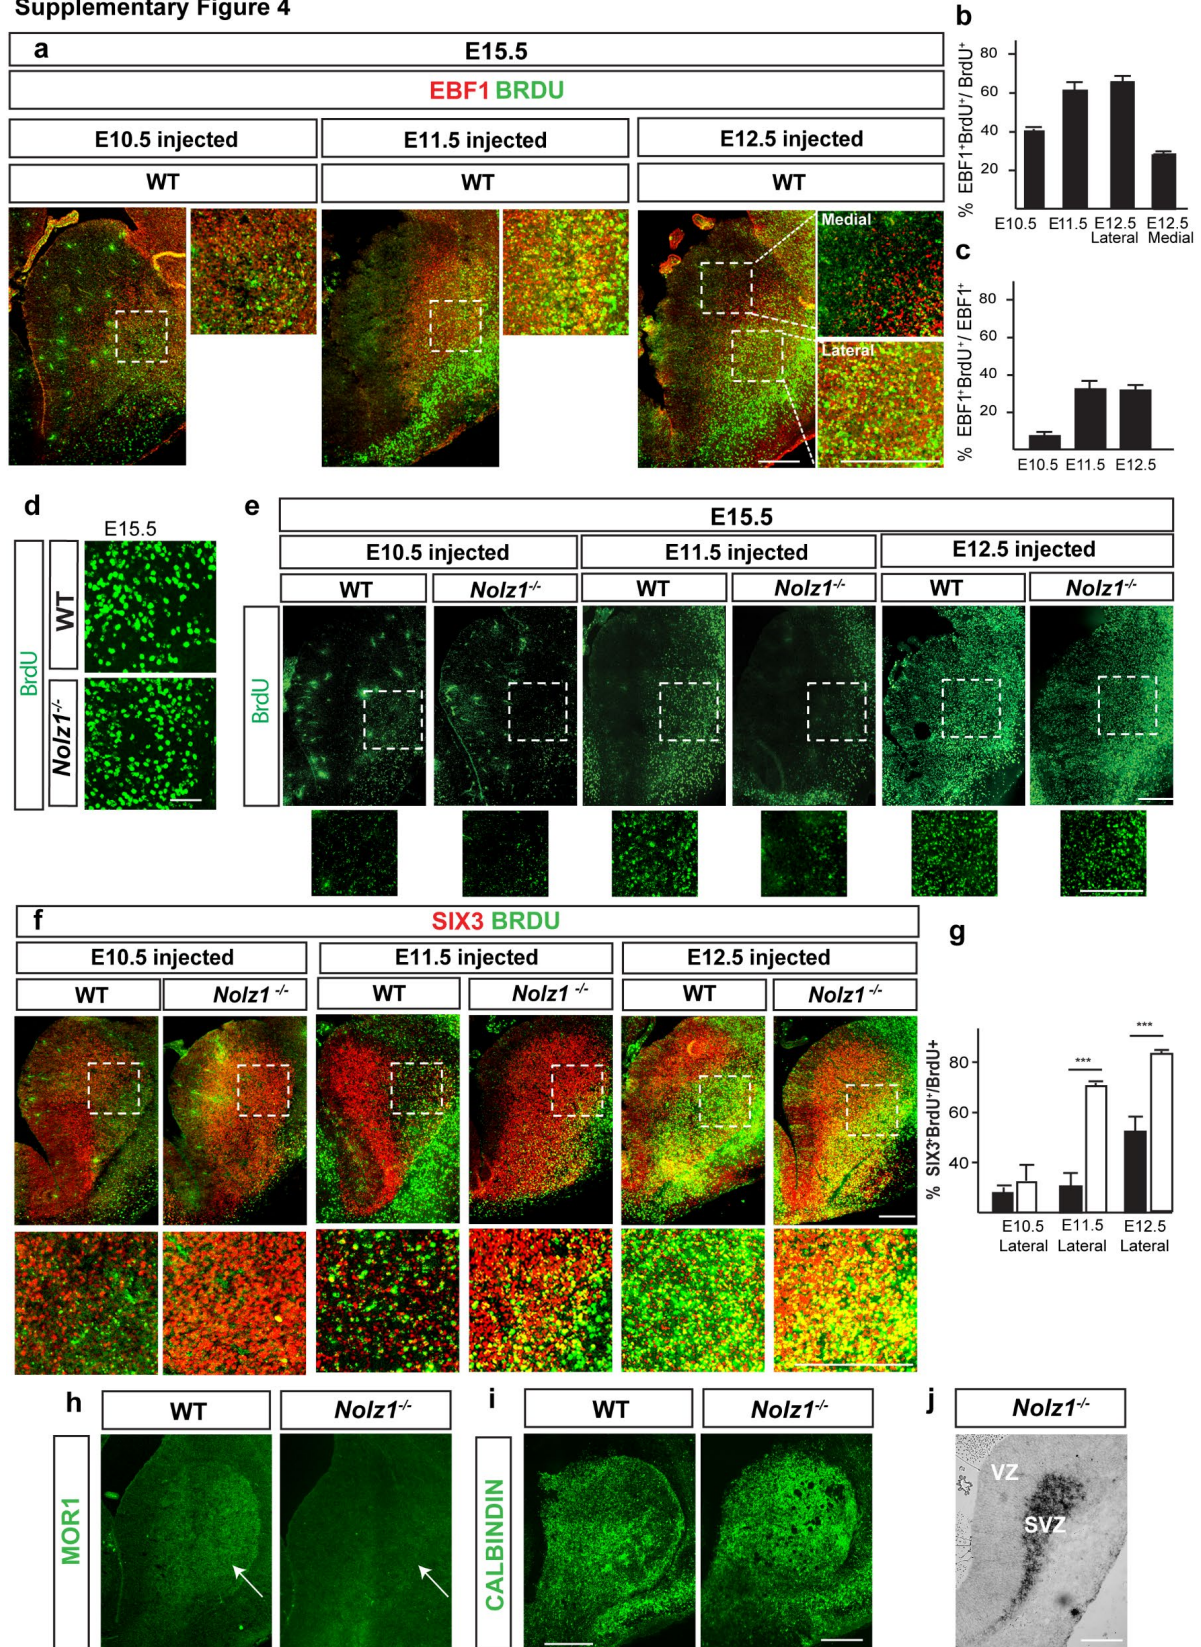

Supplementary Figure 4. Altered birthdate of striatal projection neurons in *Nolz1*<sup>-/-</sup> mutant striatum

**(a)** Immunofluorescence analysis of EBF1 and BrdU expression on coronal sections of E15.5 Wt striatum following BrdU injections at different time points (E10.5, E11.5 or E12.5). Dashed squares indicate magnified areas. **(b)** Graph showing the percentage of EBF1<sup>+</sup>BrdU<sup>+</sup> double labelled cells against the total number of BrdU<sup>+</sup> cells in the E15.5 WT striatum following BrdU injection at different time points (E10.5, E11.5 or E12.5). Mean values +/- standard deviation; n=3 biologically independent samples. **(c)** Graph showing the percentage of EBF1<sup>+</sup>BrdU<sup>+</sup> double labelled cells against the total number of EBF1<sup>+</sup> cells in the E15.5 Wt striatum following BrdU injection at different time points (E10.5, E11.5 or E12.5). Mean values +/- standard deviation; n=3 biologically independent samples. **(d)** BrdU expression visualized by immunofluorescence in the cortex of E15.5 Wt and *Nolz1*<sup>-/-</sup> mutant embryos injected with BrdU at E11.5. **(e)** Visualization of BrdU labelled cells by immunofluorescence in the striatum of E15.5 Wt and *Nolz1*<sup>-/-</sup> mutant embryos injected with BrdU at different time points (E10.5, E11.5 or E12.5). Coronal sections. Dashed squares indicate magnified areas. **(f)** Immunofluorescence analysis of SIX3 and BrdU expression on coronal sections of E15.5 Wt and *Nolz1*<sup>-/-</sup> mutant striatum following BrdU injections at different time points (E10.5, E11.5 or E12.5). Dashed squares indicate magnified areas. **(g)** Graph showing the percentage of EBF1<sup>+</sup>BrdU<sup>+</sup> double labelled cells against the total number of BrdU<sup>+</sup> cells in the E15.5 Wt and *Nolz1*<sup>-/-</sup> mutant striatum following BrdU injection at different time points (E10.5, E11.5 or E12.5). Mean values +/- standard deviation; n=3 biologically independent samples; Two-sided, unpaired T-test: E11.5 Wt versus *Nolz1*<sup>-/-</sup> \*\*\*p=0.00134; E12.5 Wt versus *Nolz1*<sup>-/-</sup> \*\*\*p=0.0052. **(h-i)** Immunohistochemical analysis of MOR1 and CALBINDIN expression in the striatum of E18.5 Wt and *Nolz1*<sup>-/-</sup> mutant embryos. **(j)** *Nolz1* expression in E11.5 Wt striatum VZ (Ventricular zone), SVZ (Subventricular zone) (SVZ). Data are representative of 3 (d, e, h-j) independent experiments. Scale bar : 200 μm (a-i). Source data are provided as a source data file.



Supplementary Figure 5

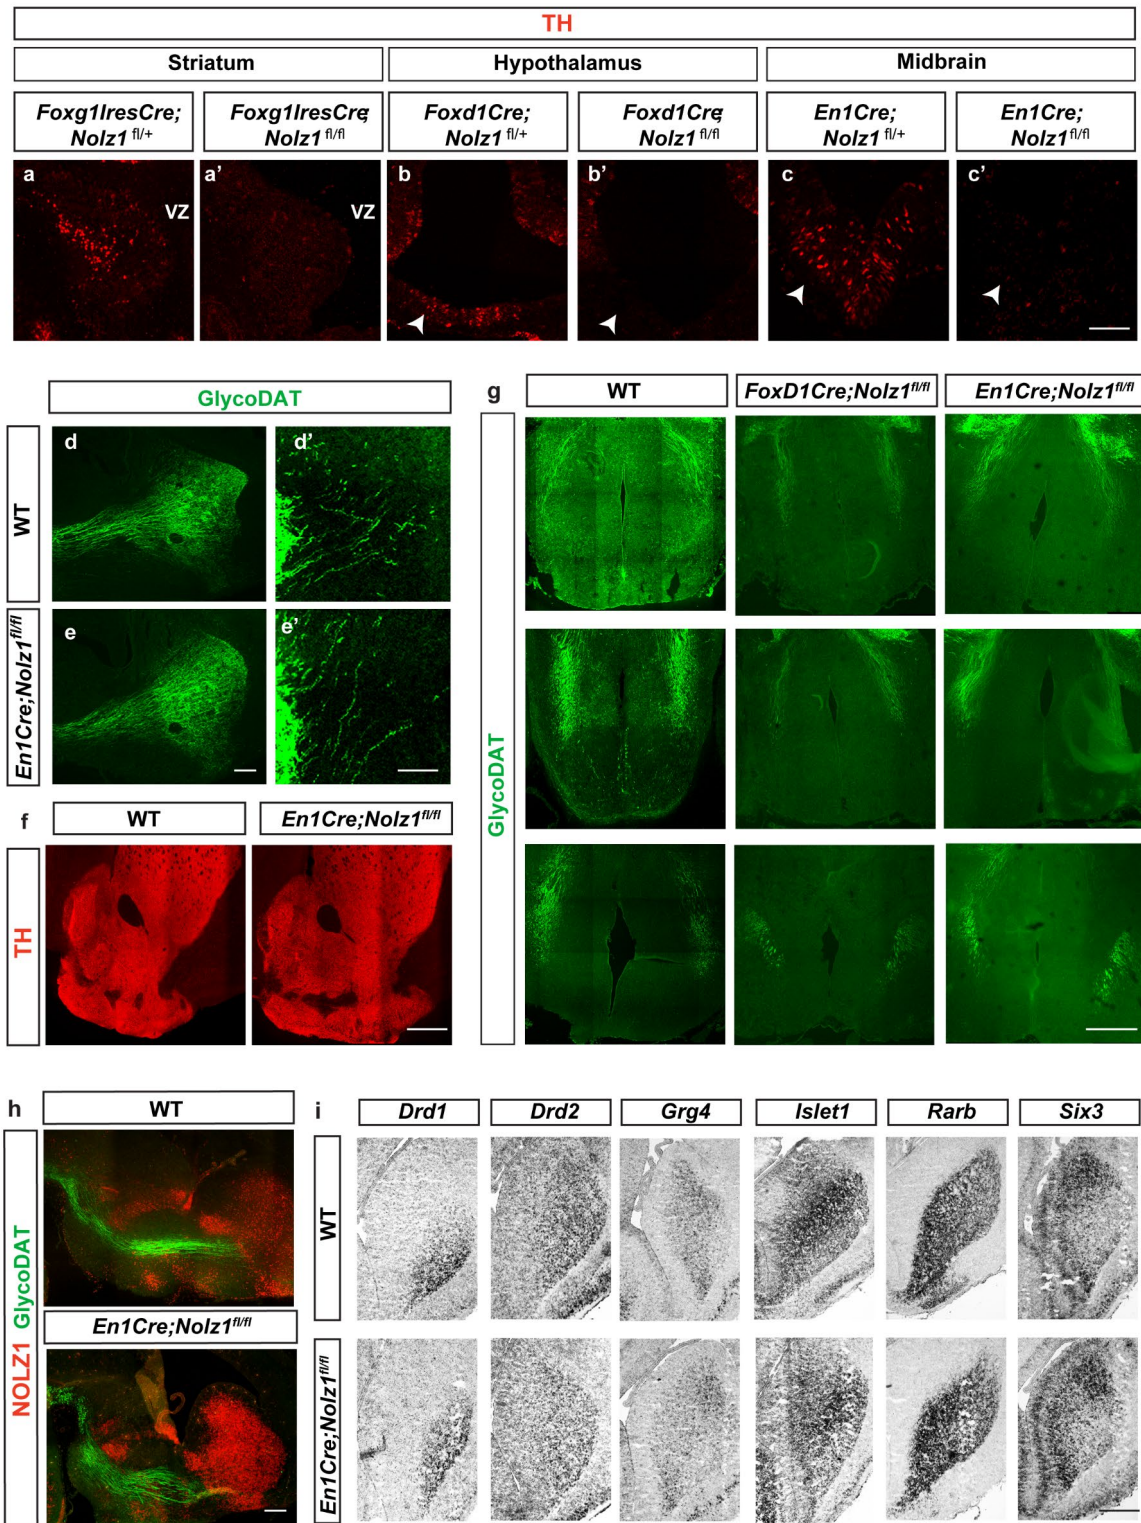

**Supplementary Figure 5. Detailed characterization of *Nolz1* conditional mouse lines**

(a-c) Immunohistochemical analysis of NOLZ1 expression at E11.5 in the striatum, hypothalamus and midbrain of *Foxg1IresCre;Nolz1<sup>fl/fl</sup>*, *Foxd1Cre;Nolz1<sup>fl/fl</sup>*, and *En1Cre;Nolz1<sup>fl/fl</sup>* mutant embryos, respectively. (d-e) GlycoDAT staining in sagittal sections of E18.5 Wt and *En1Cre;Nolz1<sup>fl/fl</sup>* mutant brains shows normal initiation of PFC innervation. (f) TH

immunohistochemistry in the nucleus accumbens of 1-year-old Wt and *En1Cre;Nolz1<sup>fl/fl</sup>* mutant mice. **(g)** Immunohistochemical analysis of GlycoDAT positive fibres in the diencephalon of E18.5 Wt, *Foxd1Cre;Nolz1<sup>fl/fl</sup>*, and *En1Cre;Nolz1<sup>fl/fl</sup>* mutant embryos reveals no difference in DA axonal projections. Coronal sections. **(h)** NOLZ1 and GlycoDAT immunostaining in E18.5 Wt and *En1Cre;Nolz1<sup>fl/fl</sup>* sagittal brain sections confirm no difference in DA axonal projections. **(i)** In situ hybridisation of several striatal markers in E15.5 Wt and *En1Cre;Nolz1<sup>fl/fl</sup>* mutant striatum. Data are representative of 3 (a-i) independent experiments. Scale bar: 100  $\mu$ m (a-e; h-i), 50  $\mu$ m (d', e'), 250  $\mu$ m (f, g).

**Supplementary Figure 6**

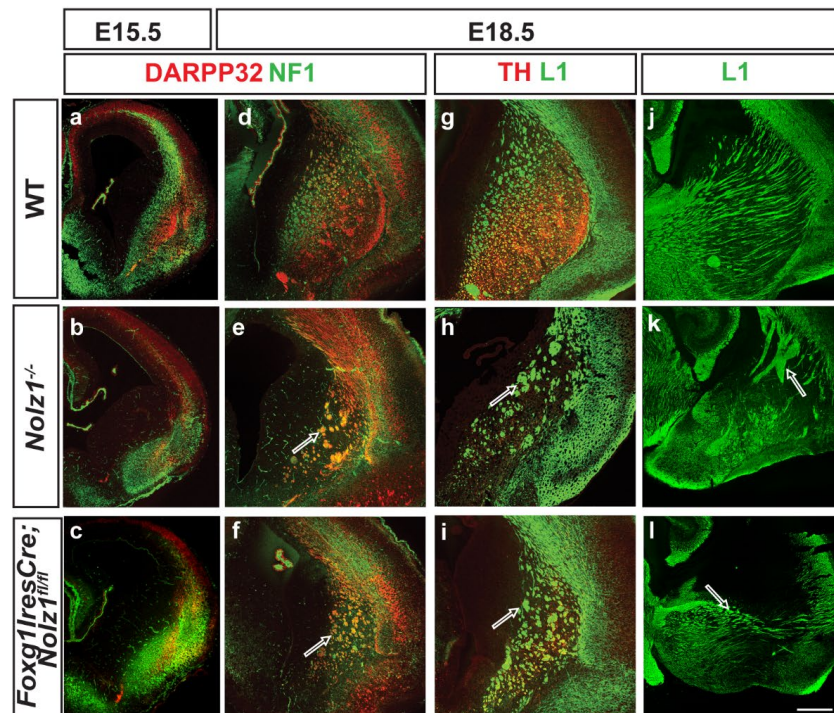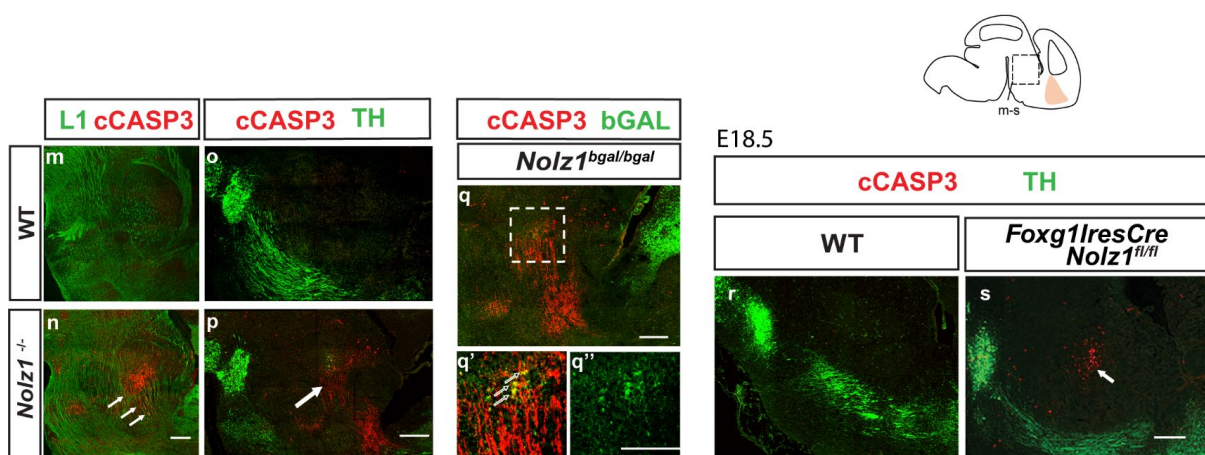

**Supplementary Figure 6. Formation of forebrain axonal tracts is impaired in *Nolz1<sup>-/-</sup>* and *FoxG1-IRES-Cre; Nolz1<sup>fl/fl</sup>* mutant embryos**

**(a-f)** Immunostaining for DARPP32 and NF1 on coronal sections of E15.5 and E18.5 Wt, *Nolz1<sup>-/-</sup>* and *FoxG1-IRES-Cre;Nolz1<sup>fl/fl</sup>* mutant striatum. Arrows (e-f) show abnormal fasciculation of

NF1<sup>+</sup> fibre bundles. **(g-i)** Immunostaining showing TH and L1 expression on coronal sections of E18.5 Wt, *Nolz1*<sup>-/-</sup> and *FoxG1-IRES-Cre;Nolz1*<sup>fl/fl</sup> mutant striatum. Arrows (H-I) show abnormal fasciculation of L1<sup>+</sup> fibre bundles. **(j-l)** Immunofluorescence labelling of L1 expression on sagittal sections of E18.5 Wt, *Nolz1*<sup>-/-</sup> and *FoxG1-IRES-Cre;Nolz1*<sup>fl/fl</sup> mutant striatum. (k, l) Arrows point to aberrant axon bundles. **(m-n)** Immunohistochemistry showing cCASP3 and L1 expression in thalamus of E18.5 Wt and *Nolz1*<sup>-/-</sup> mutant embryos on sagittal sections. (o-p) Immunostaining of cCASP3 and TH on sagittal sections of E18.5 Wt and *Nolz1*<sup>-/-</sup> mutant thalamus. **(q-q'')** Immunostaining showing the co-localisation of cCASP3 and bGAL in the thalamus of E18.5 *Nolz1*<sup>bgal/bgai</sup> mutant embryos. **(r-s)** TH and cCASP3 immunohistochemical analysis in E18.5 sagittal sections of Wt and *FoxG1iresCre;Nolz1*<sup>fl/fl</sup> mutant embryos. White arrow indicates cCASP3 expression. Data are representative of 3 (a-s) independent experiments. Scale bar: 200 μm (a-s).



## Supplementary Figure 7

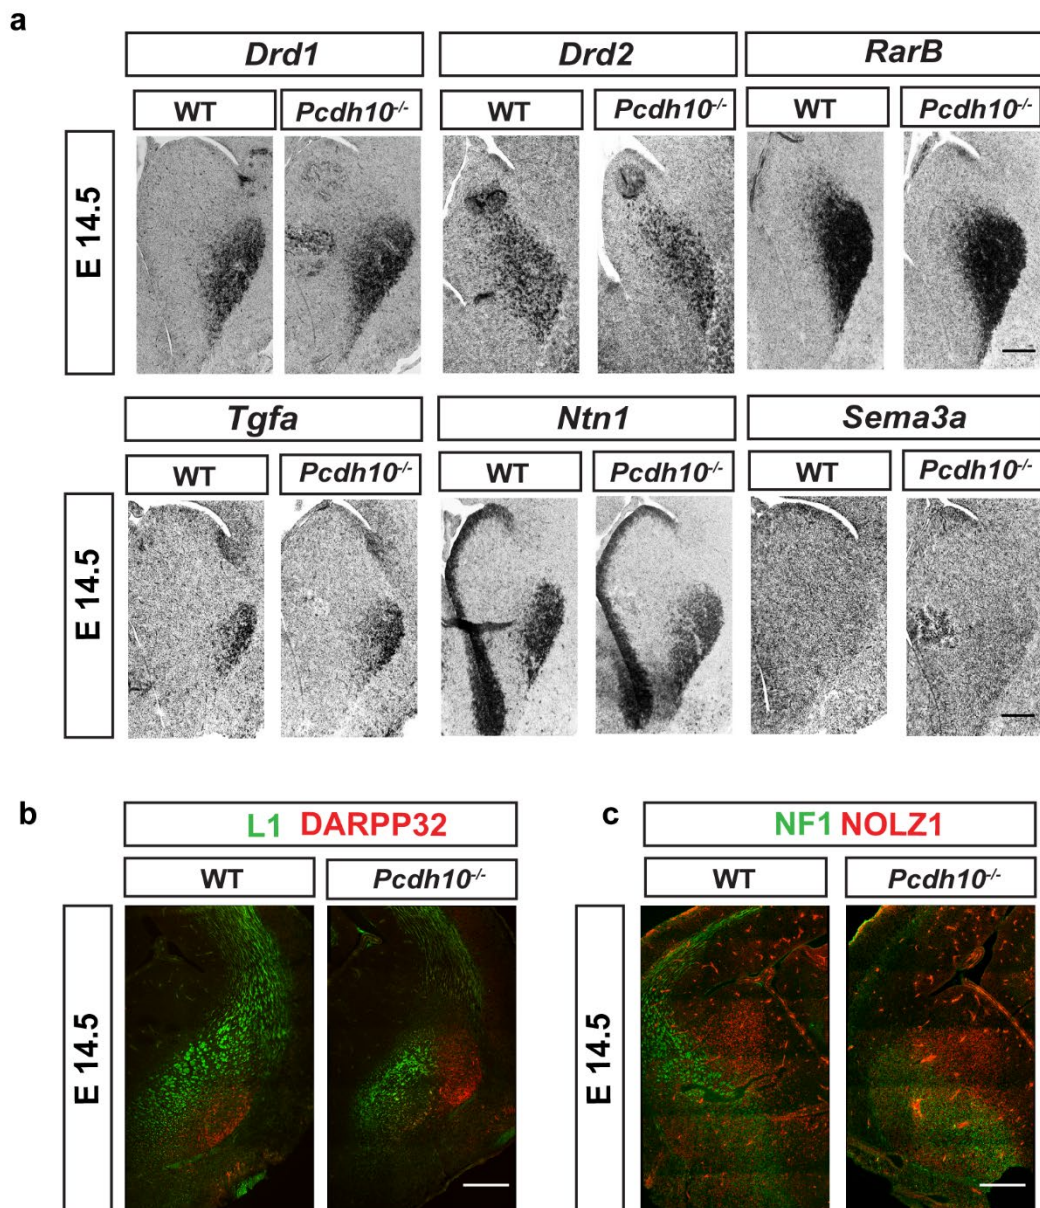

**Supplementary Figure 7. Expression of several genes involved in axon guidance are unaltered in *Pcdh10<sup>-/-</sup>* mutant embryos.**

**(a)** Expression analysis of several genes involved in striatal patterning and axon guidance by in situ hybridizations in E14.5 Wt and *Pcdh10<sup>-/-</sup>* mutant striatum. Coronal sections. **(b-c)** Immunohistochemical analysis showing expression of L1, DARPP32, NF1 and NOLZ1 on coronal sections of E14.5 Wt and *Nolz1<sup>-/-</sup>* mutant striatum. Data are representative of 3 (a-c) independent experiments. Scale bar: 200  $\mu$ m (a-c).



### Supplementary Figure 8

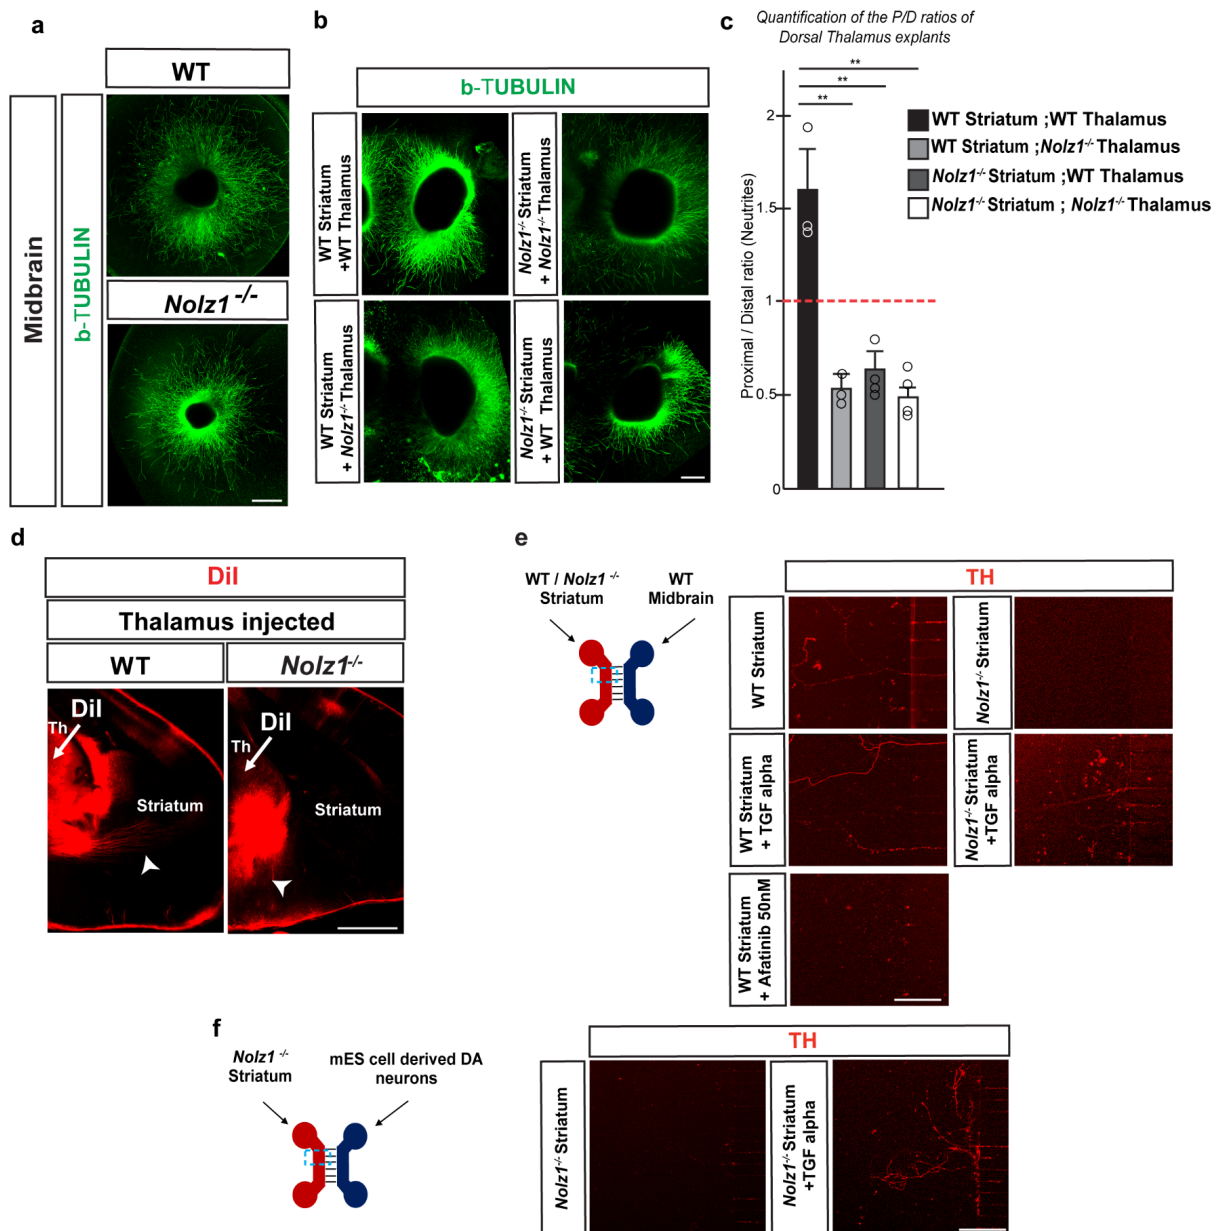

**Supplementary Figure 8. *Nol1*<sup>-/-</sup> mutant striatum exhibits repulsive activities towards DA and thalamic axons. (a)** Axonal outgrowth from E13.5 Wt and *Nol1*<sup>-/-</sup> mutant ventral midbrain explants visualized by b-TUBULIN. **(b)** Co-cultures of striatal and thalamic explants derived from E13.5 Wt and *Nol1*<sup>-/-</sup> mutant embryos and stained for b-TUBULIN. **(c)** The attractive and repulsive effects of Wt and *Nol1*<sup>-/-</sup> mutant striatum on the thalamic explants were quantified by measuring the axonal length in both the proximal (explant facing) and distal (facing away from the explant) compartment. Graph shows the proximal/distal ratio of the thalamic explants. Mean values +/- standard deviation; n=4 biologically independent experiments; Two-sided, unpaired T-test: Wt Striatum + Wt Thalamus versus *Nol1*<sup>-/-</sup> Striatum + *Nol1*<sup>-/-</sup> Thalamus \*\*p= 0.00085; Wt Striatum + Wt Thalamus versus *Nol1*<sup>-/-</sup> Striatum + Wt Thalamus \*\*p=0.0015; Wt Striatum + Wt Thalamus versus Wt Striatum + *Nol1*<sup>-/-</sup> Thalamus \*\*p=0.0031. **(d)** Dil injection in the dorsal thalamus of E15.5 Wt and *Nol1*<sup>-/-</sup> mutant embryos.

Arrow points to the Dil injection site and arrowheads to thalamic axons. **(e)** Microfluidic assay to assess attractive and repulsive effects of Wt and *Nolz1*<sup>-/-</sup> mutant striatal tissue and TGF $\alpha$  signalling on DA axons. Axons were allowed to grow for 9 days and were labelled by TH. Primary DA neurons were cultured in the presence of either Wt striatal explants, *Nolz1*<sup>-/-</sup> mutant striatal explants, WT striatal explants with 50ng ml<sup>-1</sup> TGF $\alpha$ , *Nolz1*<sup>-/-</sup> mutant striatal explants with 50ng ml<sup>-1</sup> TGF $\alpha$  or Wt striatal explants with 50nM Afatinib. **(f)** mES cell-derived DA neurons were seeded in the cellular compartment of the microfluidics chamber. Striatal explants of E13.5 *Nolz1*<sup>-/-</sup> mutant embryos were added to the opposing well and cultured with or without 50ng ml<sup>-1</sup> TGF $\alpha$ . Axons were allowed to grow for 9 days. Neurons were fixed and stained with TH (red). Data are representative of 3 (a, d, f) or 6 (e) independent experiments. Scale bar: 500  $\mu$ m (a, b), 200  $\mu$ m (d-f). Source data are provided as a source data file.

### Supplementary Table 1

#### Early patterning and neuronal specification:

*Lmx1a*, *Netrin1*, *Nkx2.1*, *Nkx2.2*, *Shh*, *Six3*, *Pax6*

#### Axonal pathfinding:

*Celsr3*, *Cxcl14*, *Dcc*, *EfnB3*, *EphA5*, *EphB2*, *Fgfr2*, *Neogenin*, *Netrin1*, *Nrp1*, *Nrp2*, *plexin A1*, *plexin A2*, *PlexinC1*, *Robo1*, *Robo2*, *Robo3*, *Sema3a*, *Sema3f*, *Sema5b*, *Sema6a*, *Sema6c*, *Sema7a*, *Slit1*, *Slit2*, *Unc5C*, *Unc13C*, *Vegfc*

#### Dopaminergic neuron specific markers:

*Aldh1a1*, *Egfr*, *ErbB4*, *Lmx1a*, *Otx2*, *Sox6*, *Tgfa*

#### Hypothalamic neuron specific markers:

*Fezl1*, *Gad1*, *Isl1*, *Lim1*, *Meis2*, *Nkx2.1*, *Nkx2.2*, *Npy*, *Otp*, *Pmch*, *Pomc*, *Sf1*, *Six3*, *Sst*

#### Zona Incerta:

*Isl1*, *Lim1*, *pax6*, *Six3*

**Supplementary Table 1.** List of genes that were normally expressed in *Nolz1*<sup>-/-</sup> mutant midbrain and diencephalon

**Supplementary Table 2**

| Signalling pathway | Pathway component in the striatum | Receptor expression in DA neurons | Expression in <i>Nolz1</i> <sup>-/-</sup> mutant striatum (up/down) |
|--------------------|-----------------------------------|-----------------------------------|---------------------------------------------------------------------|
| BMP                | Brinp1                            | Bmpr1b                            | DOWN                                                                |
| Netrin             | Ntn1                              | Dcc                               | DOWN                                                                |
| RA                 | Rarb, Brinp1                      | Rara, Rarb, Rarg                  | DOWN                                                                |
| Chemokine          | Cxcl14                            | Cxcr4                             | DOWN                                                                |
| Activin            | Inhba                             | Tgfr3                             | DOWN                                                                |
| Semaphorin         | Sema3a                            | Nrp1, Nrp2, PlexinA2              | DOWN                                                                |
| Tgf-alpha          | Tgf-alpha                         | Egfr, Erbb4                       | DOWN                                                                |
| TNF                | Fasl                              | Tnfrsf12a/19                      | UP                                                                  |
| Shh                | Shh                               | Boc                               | UP                                                                  |
| VEGF               | Vegfc                             | Kdr, Flt4                         | UP                                                                  |
| WNT                | Wnt4, Wnt5a                       | Lrp6, Fzd3                        | UP                                                                  |

**Supplementary Table 2: Signalling pathways altered in *Nolz1*<sup>-/-</sup> mutant striatum.**

Differentially expressed pathway components between Wt and *Nolz1*<sup>-/-</sup> mutant striatum that were identified by RNA seq (See Supplementary data 1).

**Supplementary Table 3.** Resource table**Primary antibodies**

| <b>Antigen</b>    | <b>Species</b> | <b>Company (cat. no.)</b>    | <b>Dilution</b>                |
|-------------------|----------------|------------------------------|--------------------------------|
| ALDH1a1           | Rabbit         | Sigma (HPA050139)            | 1:1000                         |
| B-GAL             | Goat           | AbD Serotec (4600-1409)      | 1:2000                         |
| BRDU              | Rat            | Abcam (ab6326)               | 1:500                          |
| CALBINDIN         | Rabbit         | Swant (CB38)                 | 1:500                          |
| cCASP-3           | Rabbit         | Cell Signaling (9579S)       | 1:1000                         |
| CTIP2             | Rat            | Abcam (18465)                | 1:1000                         |
| DARPP32           | Rabbit         | Santa Cruz (sc-11365)        | 1:200                          |
| DAT               | Rat            | Merck Millipore (MAB369)     | 1:500                          |
| EBF1              | Rabbit         | Merck Millipore (ab10523)    | 1:500                          |
| FOXP1             | Rabbit         | Abcam (ab16645)              | 1:1000                         |
| FOXP2             | Rabbit         | Abcam (ab16046)              | 1:1000                         |
| GFP               | Goat           | Abcam (ab6673)               | 1:1000                         |
| ISL1              | Mouse          | DSHB (40.3A4)                | 1:50                           |
| L1                | Rat            | Merck Millipore (MAB5272)    | 1:1000                         |
| MOR1              | Rabbit         | Immunostar (24216)           | 1:4000                         |
| NF1               | Mouse          | DSHB (2H3-S1ea)              | 1:200                          |
| NKX2.1 (TTF1)     | Rabbit         | Abcam (ab76013)              | 1:1000                         |
| OTX2              | Goat           | R&D Systems (AF1979-SP)      | 1:500                          |
| SIX3              | Guinea pig     | Rockland (200-201-A26)       | 1:500                          |
| SIX3              | Rabbit         | Rockland (600-401-A26)       | 1:500                          |
| TAG1              | Mouse          | DSHB (4D7/TAG1-S)            | 1:200                          |
| TH                | Sheep          | Pel-Freez (P60101-150)       | 1:1000                         |
| TH                | Rabbit         | Pel-Freez (P40101-150)       | 1:1000 (IHC)<br>1:400 (iDISCO) |
| b-TUBULIN         | Mouse          | Biologend (801202)           | 1:1000                         |
| ZNF503<br>(NOLZ1) | Rabbit         | Atlas Antibodies (HPA026848) | 1:1000                         |



## Secondary antibodies

| <b>Antigen</b>              | <b>Species</b> | <b>Company (cat. no)</b>   | <b>Dilution</b> |
|-----------------------------|----------------|----------------------------|-----------------|
| Anti-Goat Alexa Fluor 488   | Donkey         | Invitrogen (A-11055)       | 1:500           |
| Anti-Goat Alexa Fluor 555   | Donkey         | Invitrogen (A-21432)       | 1:500           |
| Anti-Goat Alexa Fluor 647   | Donkey         | Invitrogen (A-21447)       | 1:500           |
| Anti-Mouse Alexa Fluor 488  | Donkey         | Invitrogen (A-21202)       | 1:500           |
| Anti-Mouse Alexa Fluor 555  | Donkey         | Invitrogen (A-31570)       | 1:500           |
| Anti-Rabbit Alexa Fluor 488 | Donkey         | Invitrogen (A-21206)       | 1:500           |
| Anti-Rabbit Alexa Fluor 555 | Donkey         | Invitrogen (A-31572)       | 1:500           |
| Anti-Rabbit Alexa Fluor 647 | Donkey         | Invitrogen (A-32795)       | 1:500           |
| Anti-Rat Alexa Fluor 488    | Donkey         | Invitrogen (A-21208)       | 1:500           |
| Anti-Guinea pig Cy5         | Donkey         | Stratech (706-175-148-JIR) | 1:800           |
| Anti-Rat Alexa Fluor 488    | Goat           | Abcam (150157)             | 1:500           |

## Primers used for in situ probe synthesis

| Gene            | Primer sequence                 |                                |
|-----------------|---------------------------------|--------------------------------|
| <i>Adam23</i>   | (Fwd) CTCAACACCAGGGTTGCCT       | (Rev) TCTTGCACTCGCCATTGTAG     |
| <i>Adora2a</i>  | (Fwd) ATGGGCTCCTCGGTGTACATCATG  | (Rev) TCAGGAAGGGGCAAACCTGAAGAC |
| <i>Atn1</i>     | (Fwd) CCCAAGCCCAGCAGACTA        | (Rev) ATGACCAGCCCTGTCCAA       |
| <i>Brinp1</i>   | (Fwd) AACCACCAGCTGCCTAGAGA      | (Rev) TAGCATTGGCTGTTTTGCAG     |
| <i>Cdh8</i>     | (Fwd) GATGGAGATGGGACAGCACT      | (Rev) TGTTTTGCCAGAATGCTCAG     |
| <i>Chat</i>     | (Fwd) CAGCTGGCTTACTACAGGCTTT    | (Rev) AATGAGGGGCTCTCTCTCTCT    |
| <i>Chrm4</i>    | (Fwd) ATGGCGAACTTCACACCTGTCAATG | (Rev) CTACCTGGCTGTGCCGATGTTCC  |
| <i>Cxcl14</i>   | (Fwd) CTGCTCCTGCTGCTCCTG        | (Rev) GTAGACCCTGCGCTTCTCGT     |
| <i>Drd1</i>     | (Fwd) TCCCAAGGAAGCTCCGAGAA      | (Rev) AGGCTACCCAAATGTTACAA     |
| <i>Drd2</i>     | (Fwd) GAAGATCCTGCACTGCTGAGT     | (Rev) ATGTTACAGAGTTGGAGCCCAG   |
| <i>Ebf1</i>     | (Fwd) TGACATGAGTCCAGAGTGGAACCT  | (Rev) CACTTCATTCTCCCCTCCATAGCT |
| <i>Epha8</i>    | (Fwd) CCTGTGAGCTGGGCTTCTAC      | (Rev) TGAGTGTGAGGCAGATCCAG     |
| <i>EphB1</i>    | (Fwd) CAGTCGCTCCCCTTCAGA        | (Rev) TGGCCACCAGAGACACAA       |
| <i>ER81</i>     | (Fwd) GTGCCTCTGTCTCACTTTGATG    | (Rev) CTACTGGCCTGTGACTCAGTTG   |
| <i>ESR1</i>     | (Fwd) ATGACCCTTCACACCAAAGC      | (Rev) TCATCATGCCCACTTCGTAA     |
| <i>Foxp1</i>    | (Fwd) ACCTTCCAAGTCTCCCTAATC     | (Rev) TAAATGGTGGTCTAACTCCGC    |
| <i>Gad1</i>     | (Fwd) TGTGCCCAAACCTGGTCCT       | (Rev) TGGCCGATGATTCTGGTT       |
| <i>Gpr6</i>     | (Fwd) CGCTCAACGAGTCCCAAGTGGT    | (Rev) TCAGACCTCACTGGGGGACCTG   |
| <i>Grg4</i>     | (Fwd) GTAAGCACTGGAAAGGACAACC    | (Rev) GTTGCCCAAATAGACTCAAAGG   |
| <i>Grik3</i>    | (Fwd) CTCAATATCACTGAGGTTGCCA    | (Rev) GGTGGAGATCTTGATTTCTTG    |
| <i>LHX8</i>     | (Fwd) GAAGAGCGATCAGATGTTTGTG    | (Rev) CACCTGTATGACACGTCTGCTT   |
| <i>Meis2</i>    | (Fwd) AGTCCAGAGGGTCAGCCC        | (Rev) CTCCGCAGCATGGTTCTT       |
| <i>Netrin1</i>  | (Fwd) CTTCTCACCACCTCAATAAC      | (Rev) TAGAGCTCCATGTTGAATCTGC   |
| <i>NPY1R</i>    | (Fwd) TCACCTTGCTCTCGCTTAT       | (Rev) TGATTGCTTGGTCTCACTG      |
| <i>Nrp1</i>     | (Fwd) GGAAGGTGACAAGAACATCTC     | (Rev) CTTGTGTCTGTAGGTGACGCTC   |
| <i>Nrp2</i>     | (Fwd) GGTGAAGAATGGCTTCAGGTAG    | (Rev) AACTCCATGTCATAGCTGGGC    |
| <i>Pak3</i>     | (Fwd) TCATTGCACCAAGACCAGAG      | (Rev) CCCACCATAGTGCTTCGTTT     |
| <i>Pcdh10</i>   | (Fwd) CACTTATCCTTATCATCGCCCT    | (Rev) CAGATTTCAAAGAAGGCAGGAC   |
| <i>Pdyn</i>     | (Fwd) AGGAAAAGTTCAGGGGTCTCTC    | (Rev) TCTCACAGTTCCTATGCAATAC   |
| <i>PlexinC1</i> | (Fwd) AGGTTTTCCAAGCCTTCCTAAG    | (Rev) CATGCAAGAGTTGTTTCTGAGC   |
| <i>PlexinD1</i> | (Fwd) CCACTACAAGATACCTGAGGGC    | (Rev) TGAGAGATGTGGGAAGAAAC     |
| <i>PP2CA</i>    | (Fwd) CCTCTGCGAGAAGGCTAAAG      | (Rev) CAGCTTGTTACCACAACGA      |
| <i>PPP3CA</i>   | (Fwd) GGGACATCCATGGACAATTC      | (Rev) CATGAAATTTGGGAGCCAGT     |
| <i>Ptprm</i>    | (Fwd) AGAGCTGGCCATCAGCAC        | (Rev) AGTTCTTGCTTTCTTGGC       |
| <i>Rar Beta</i> | (Fwd) GACCTTGAGGAACCAACAAAAG    | (Rev) ACAACCTCGGTGCTTGGTTAT    |
| <i>Rgs4</i>     | (Fwd) CCTGCGAACACAGTTCTTCA      | (Rev) GAGACCAGGGAAGTGCAGTC     |
| <i>Robo1</i>    | (Fwd) CTGAAGACAACCAGAGAGGCTT    | (Rev) CCTCCTTAAGTGGCTCTTCTGA   |
| <i>Robo2</i>    | (Fwd) GTAATAGGTGGCTTGTCCCTG     | (Rev) GCAGGATTTGTGTAGTGGCATA   |
| <i>Sema 3d</i>  | (Fwd) TGAGCAGATGTGGTACAAGGAG    | (Rev) TAGATGTAGCCTGGTCCACAAA   |
| <i>Sema3a</i>   | (Fwd) TATCGAATTCGGCTTTGGAC      | (Rev) CGCAGCAGTTCAGAGTACA      |

|                      |                              |                              |
|----------------------|------------------------------|------------------------------|
| <i>Serpine2</i>      | (Fwd) TCCACGGTGATGCGATATAA   | (Rev) CCTTTGATGGCTCAAACAT    |
| <i>Six3</i>          | (Fwd) AGAGTTGTCCATGTTCCAGTTG | (Rev) CTGATTTGGTTTGTCTAGGG   |
| <i>Sorl1</i>         | (Fwd) CGTGGTGAACCTTTTCTGGT   | (Rev) CAGGTTCCAGCTTGCTTAGG   |
| <i>SP9</i>           | (Fwd) TACAAGTCGGGCTTCCACTC   | (Rev) CCGTTGTGCGTCTTAATGTG   |
| <i>Srgap2</i>        | (Fwd) AGCCCGAGAACTGTCTTTCA   | (Rev) AGTGGTTCCAAGGTGTCCAG   |
| <i>Tac1</i>          | (Fwd) CCCCTGAACGCACTATCTATTC | (Rev) CAGGAAACATGCTGCTAGGATA |
| <i>Tgf<br/>alpha</i> | (Fwd) CTCTGCTAGCGCTGGGTATC   | (Rev) CAAGCAGTCCTCCCTTCAG    |
| <i>TNN</i>           | (Fwd) CAAGACCTGGAACAGGGTGT   | (Rev) TTCTGCCAGAGAAACGGTCT   |
| <i>Zfp 521</i>       | (Fwd) CAGACGCCAACAGCACAC     | (Rev) TGGGCCGTATCCAGATGT     |

## Specific reagents

| Reagent name                     | Supplier          | Cat number       |
|----------------------------------|-------------------|------------------|
| 100mm tissue culture dishes      | Corning           | 3296             |
| 24 well plates (mouse)           | Corning           | 3337             |
| 96 well plates                   | Greiner bio-one   | 655095           |
| Activin A                        | R&D               | 338-AC           |
| Afatinib                         | Selleckchem       | BIB2992          |
| B27 supplement                   | Life technologies | 17504-044        |
| bFGF                             | R&D               | 233-FB           |
| Collagen                         | Gibco             | A10483-01        |
| DAPI                             | Sigma             | D9564            |
| Denhart's                        | Sigma             | D2532            |
| Dig RNA                          | Roche             | 11277073910      |
| Dimethyl sulfoxide (DMSO)        | Sigma             | D8418            |
| DMEM high glucose                | Gibco             | 41965-039        |
| DMEM/F12                         | Gibco             | 10565-018        |
| DMEM/F12 Glutamax                | Gibco             | 31331-028        |
| DPBS -Ca -Mg                     | Gibco             | 14190-094        |
| Fetal bovine serum (FBS)         | Gibco             | 16141-079        |
| HBSS/Ca/Mg                       | Gibco             | 14025-050        |
| Hepes                            | Gibco             | 15630-049        |
| Insulin                          | Gibco             | 12585-014        |
| KnockOut Serum Replacement (KSR) | Gibco             | 10828028         |
| L-Glutamine                      | Gibco             | 25030-024        |
| Laminin                          | Sigma             | L2020            |
| Levamisol                        | Sigma             | L9756-10G        |
| LIF                              | Merck Millipore   | ESG1107          |
| Lipofectamin LTX                 | Invitrogen        | 15338-100        |
| N,N-Dimethylformamide            | Thermo Fisher     | D/3840/08        |
| Netrin 1                         | Adipogen          | AG-40B-0040-C010 |



|                                      |                    |             |
|--------------------------------------|--------------------|-------------|
| <b>Neurobasal</b>                    | Gibco              | 12348-017   |
| <b>Non-adherent bacterial dishes</b> | Thermo Fisher      | 101R20      |
| <b>Non-essential amino acids</b>     | Gibco              | 11140-050   |
| <b>Nunc- 24 well plates</b>          | Thermo scientific  | 142475      |
| <b>Nunc- 6 well plates</b>           | Thermo scientific  | 140675      |
| <b>Paraformaldehyde</b>              | Sigma              | P6148       |
| <b>Penicillin-Streptomycin</b>       | Thermo Fisher      | 15140-122   |
| <b>Poly-D-Lysine</b>                 | Merck Millipore    | A-003-E     |
| <b>Poly-L-ornithine</b>              | Sigma              | P4957       |
| <b>Progesterone</b>                  | Sigma              | P6149       |
| <b>Purmorphamine</b>                 | Calbiochem         | 540220-5    |
| <b>Putrescine dihydrochloride</b>    | Sigma              | P5780       |
| <b>Rnase Inhibitor</b>               | Applied Biosystems | 100021540   |
| <b>RNeasy Micro kit</b>              | Qiagen             | 74004       |
| <b>SAG1.3</b>                        | Calbiochem         | 566660      |
| <b>Sema3a (Fc chimera)</b>           | R&D                | 1250-S3     |
| <b>Sodium bicarbonate</b>            | Sigma              | S8761-100ml |
| <b>Sodium selenite</b>               | Sigma              | S9133       |
| <b>Standard Neuron Device</b>        | Xona Microfluidics | SND900      |
| <b>Super Frost</b>                   | Thermo scientific  | J1800AMNZ   |
| <b>Sybr green Master Mix</b>         | Applied Biosystems | 4385612     |
| <b>TGF alpha</b>                     | R&D                | 239-A       |
| <b>Transferrin human</b>             | Sigma              | T8158       |
| <b>TrypLE Express</b>                | Gibco              | 12604-013   |
| <b>β-Mercaptoethanol</b>             | Sigma              | M3148       |
|                                      |                    |             |
|                                      |                    |             |
